# Supplementary material for: Non-catalytic Roles of Tet2 Are Essential to Regulate Hematopoietic Stem and Progenitor Cell Homeostasis
Source: PubMed Central journal article supplement — Cell Rep. Author manuscript; Available in PMC 2019 Sep 18. (PMC6750732; doi:10.1016/j.celrep.2019.07.094), 2019-09-03
Supplement: NIHMS1539482-supplement-1.pdf [file NIHMS1539482-supplement-1.pdf]

**Cell Reports, Volume 28**

## **Supplemental Information**

### **Non-catalytic Roles of Tet2 Are Essential to Regulate Hematopoietic Stem and Progenitor Cell Homeostasis**

**Kyoko Ito, Joun Lee, Stephanie Chrysanthou, Yilin Zhao, Katherine Josephs, Hiroyo Sato, Julie Teruya-Feldstein, Deyou Zheng, Meelad M. Dawlaty, and Keisuke Ito**

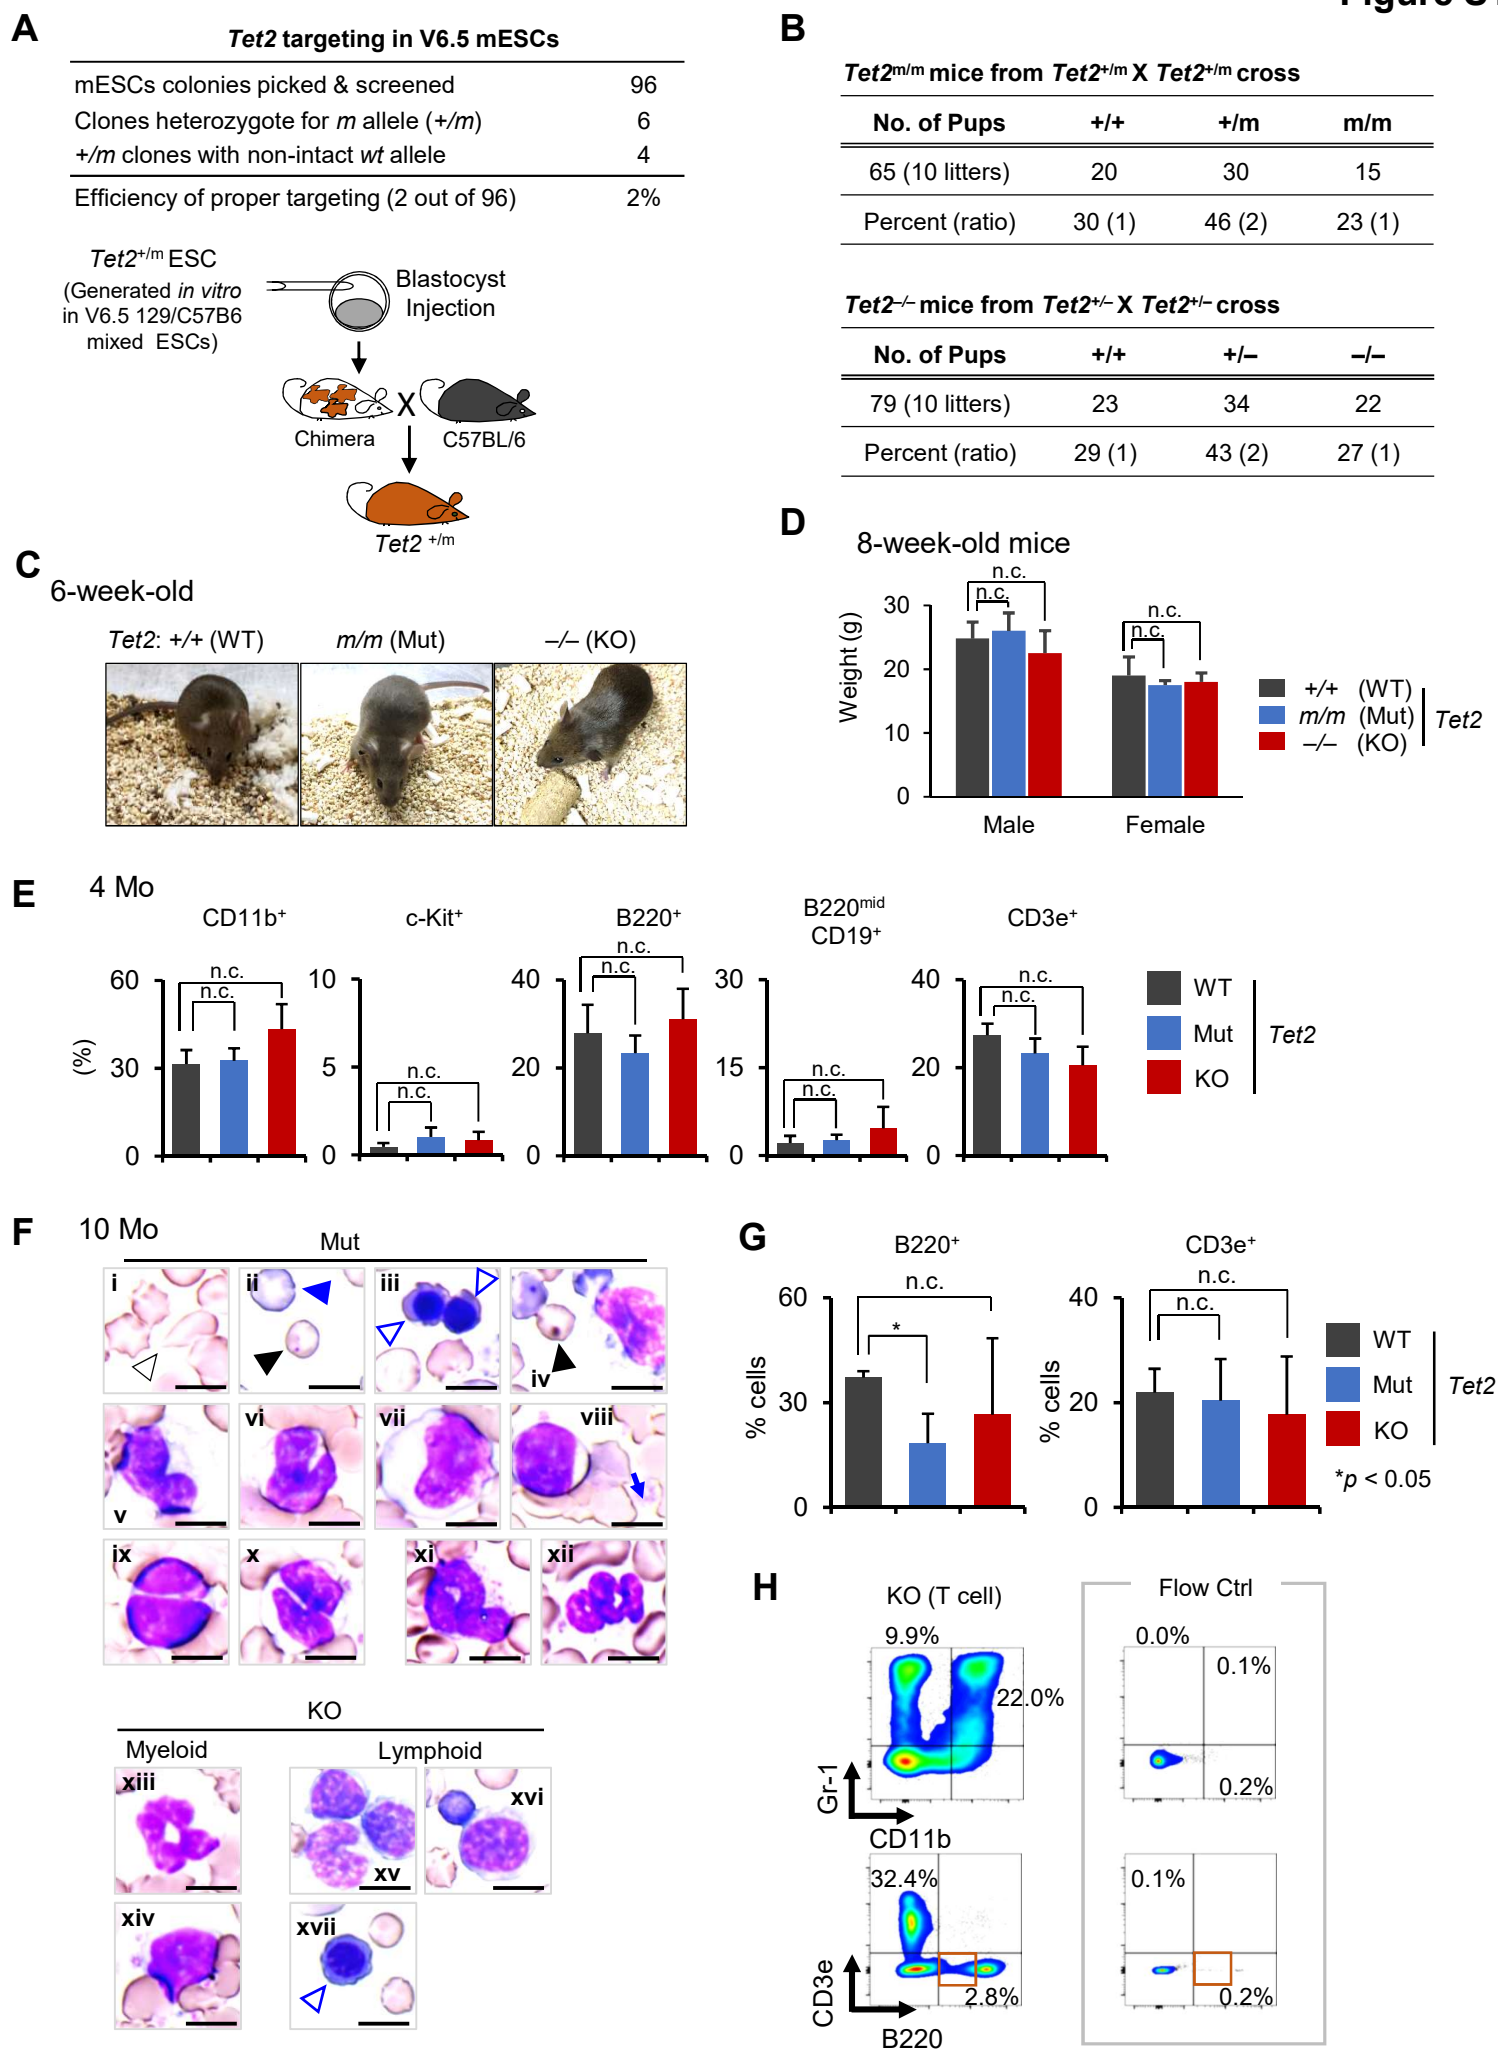

**Figure S1 (Related to Figure 1). Generation and hematopoietic characterization of *Tet2* catalytic mutant mice**

- (A) Summary of *Tet2* gene-editing in mouse ES cells (top) and schematic of injection of an edited ESC clone into blastocyst to generate *Tet2* catalytic mutant mice.
- (B) Mendelian ratios of *Tet2* catalytic mutant (Mut) and knockout (KO) mice. *Tet2* Mut mice, like knockout mice, are produced at normal mendelian frequency.
- (C) Images of 6-week-old *Tet2* mice of the indicated genotypes.
- (D) Body weight of live *Tet2* Mut and KO mice showing no differences in overall growth in young age.
- (E) Percentages of the indicated fractions in the peripheral blood in *Tet2* Mut and KO mice (4 months old) ( $n = 6$ ).
- (F) Representative images of abnormal hematopoietic cells in PB smears of 10-month-old *Tet2* Mut (i-xii) and KO mice (xiii-xiv, with myeloid disorders; xv-xvii, with lymphoid malignancy). Dysplastic erythroid cells [i-iv, xvii; polychromatophilic (ii, blue arrowhead), Howell-Jolly bodies (ii and iv, black arrowhead), other poikilocytes (e.g. teardrop-shaped dacrocyte and echinocytes) (i, black-outlined arrowhead), and nucleated erythroid cells (iii and xvii, blue-outlined arrowhead). Dysplastic monocytes [v-x and xiv; a pseudo-Pelger-Huet anomaly (ix and x)] and dysplastic platelet (giant platelet) (blue arrow, viii) are shown. Dysplastic neutrophils (xi-xiii) and immature B cells (xv and xvi) are also shown. All images are taken at x100. Scale bars, 10 $\mu$ m.
- (G) Percentages of B220<sup>+</sup> (left) and CD3e<sup>+</sup> (middle) cells in the PB in *Tet2* Mut and KO mice (10 months old).
- (H) Representative flow data for myeloid and lymphoid lineages in PB from *Tet2* KO mice with T lymphoid phenotypes (10 months old). Unstained flow controls are also shown (right, inset).

Error bars indicate standard deviation. n.c. stands for no significant change.

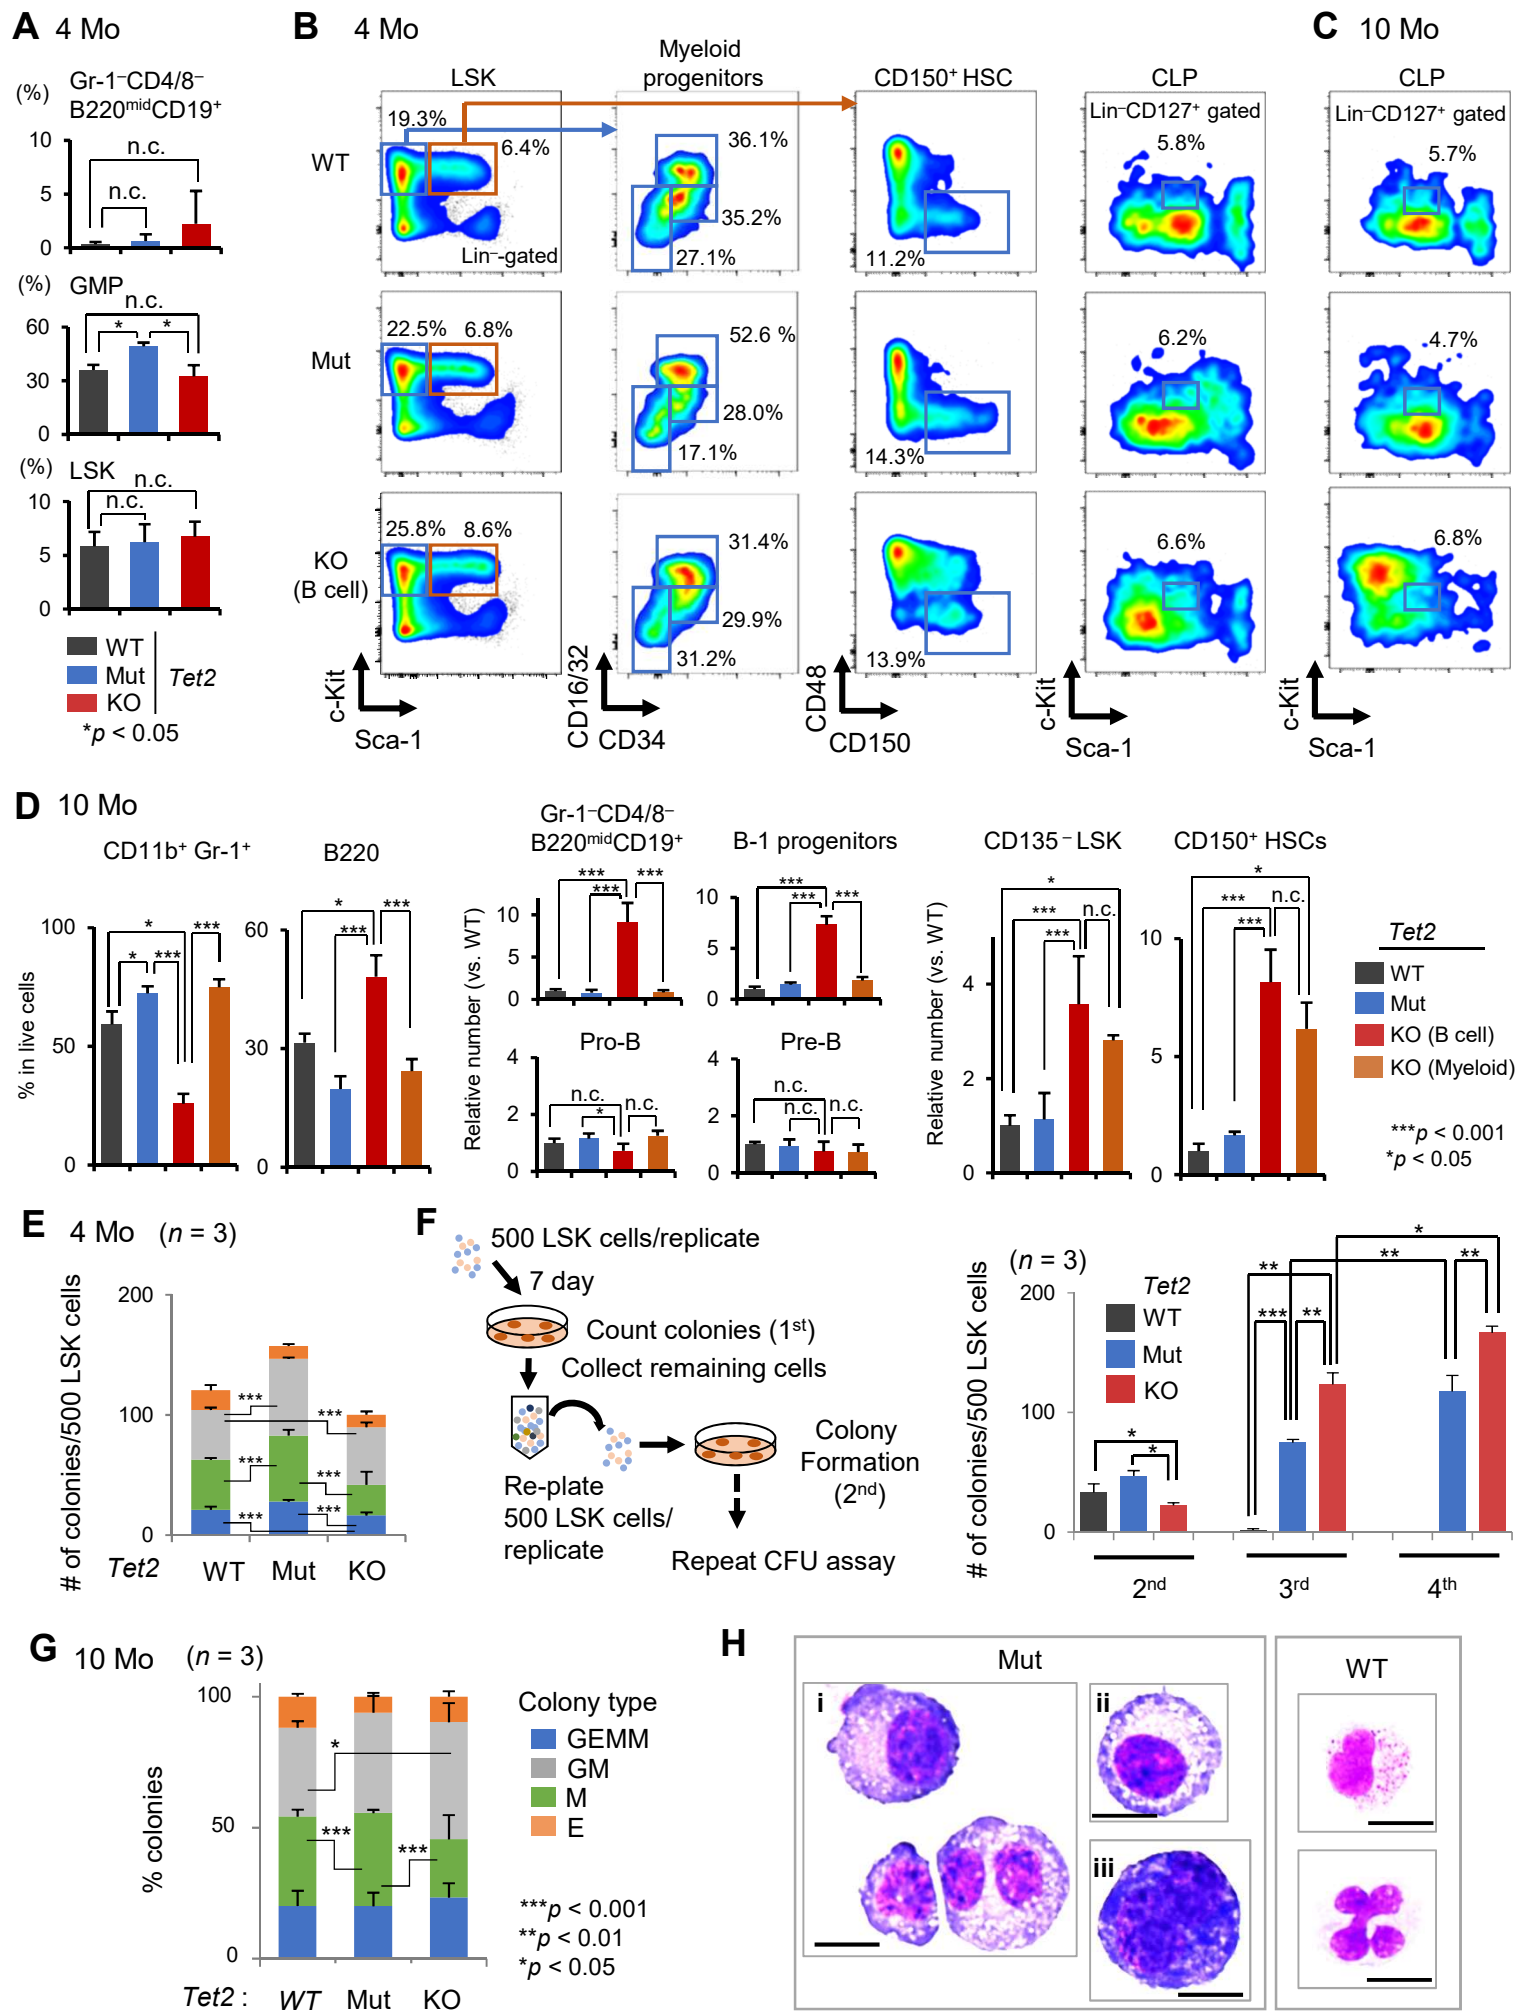

**Figure S2 (Related to Figure 2). Phenotypic and functional characterization of HSPCs from *Tet2* Mut and KO mice**

- (A) Percentages of the indicated fractions in the peripheral blood in *Tet2* Mut and KO mice (4 months old) ( $n = 6$ ).
- (B, C) Bone marrow flow analysis for the indicated immature fractions from *Tet2* Mut and KO mice (4 months old, B; 10 months old, C).
- (D) Percentages in live mononuclear cells (left) or relative absolute number (middle, right) of the indicated fractions in the bone marrow in *Tet2* Mut and KO mice (10 months old) ( $n = 6$ ). The alterations of Pro-B and Pre-B are minor in *Tet2* KO mice, while both B-1a fractions and B-1 progenitors are increased.
- (E, F) Colony-forming capacity of HSPCs from 4-month-old *Tet2* Mut and KO mice ( $n = 3$ ) (E). Overview of the experimental design for *in vitro* colony-replating assay (F, left). *Tet2*-KO HSCs have the increased re-plating capacity compared to *Tet2*-Mut HSCs (4 months old, up to 4<sup>th</sup> round re-plating data,  $n = 3$ ) (F, right).
- (G, H) Profiles of the colonies formed by HSPCs from 10-month-old *Tet2* Mut and KO mice ( $n = 3$ ). Representative images of May-Grünwald-Giemsa–stained cytopsin preparations of the formed-colonies by hematopoietic stem and progenitor cells from *Tet2* Mut and wild-type mice (at 2<sup>nd</sup> replating) (H). Scale bars, 10 $\mu$ m.

HSPCs, hematopoietic stem and progenitor cells; LSK, Lineage<sup>-</sup>cKit<sup>+</sup>Sca1<sup>+</sup>; GMP, granulocyte-monocyte progenitor; CLP, common lymphoid progenitor; Pro-B, Gr-1<sup>-</sup>CD4/8<sup>-</sup>IgM<sup>-</sup>CD43<sup>+</sup>; Pre-B, Gr-1<sup>-</sup>CD4/8<sup>-</sup>IgM<sup>-</sup>CD43<sup>-</sup>; B-1 progenitor, Gr-1<sup>-</sup>CD4/8<sup>-</sup>IgM<sup>-</sup>CD19<sup>+</sup>B220<sup>dim/-</sup>; GEMM, Colony-forming unit-granulocyte, erythroid, macrophage, and megakaryocyte; GM, Colony-forming unit-granulocyte and macrophage; M, Colony-forming unit-macrophage; E, Burst-forming unit-erythroid. Error bars indicate standard deviation. n.c. stands for no significant change.

**A**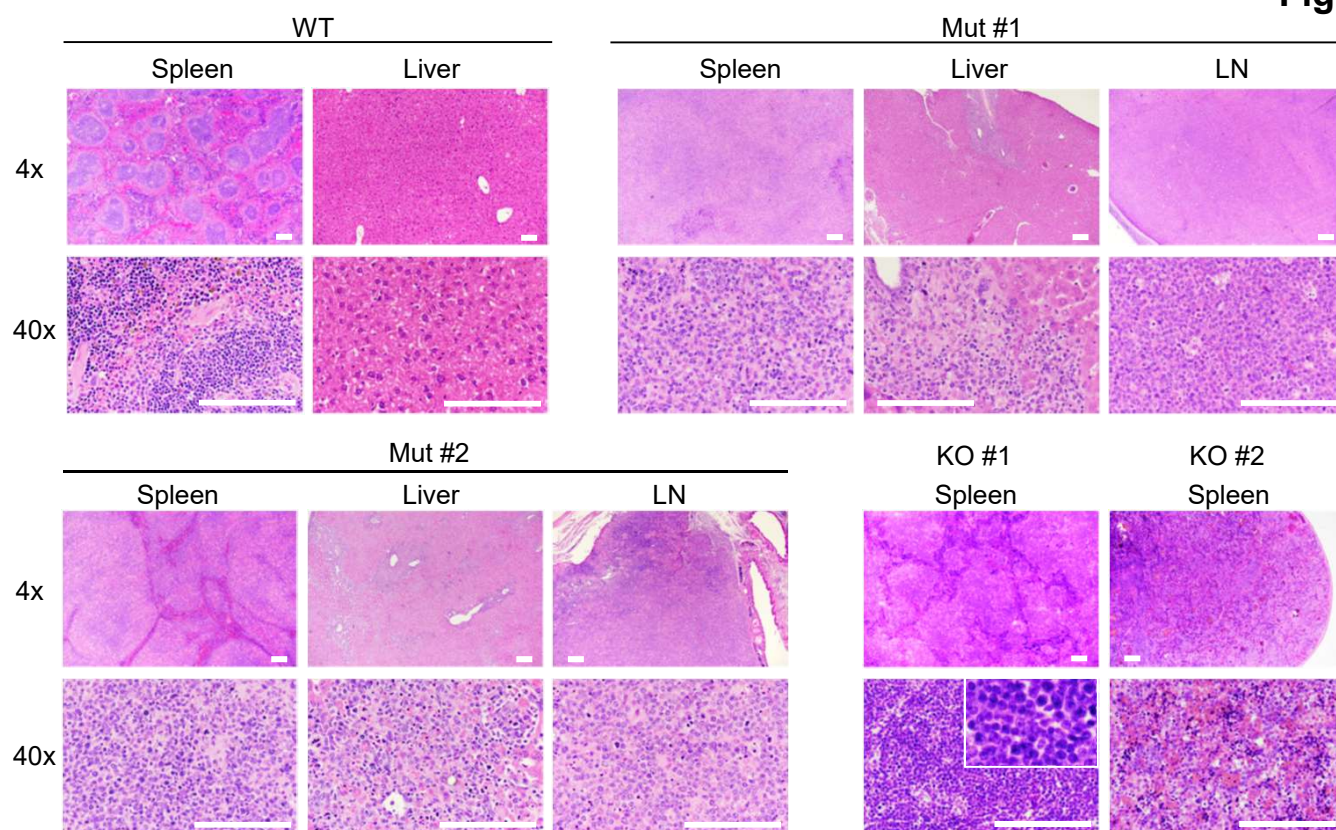**B**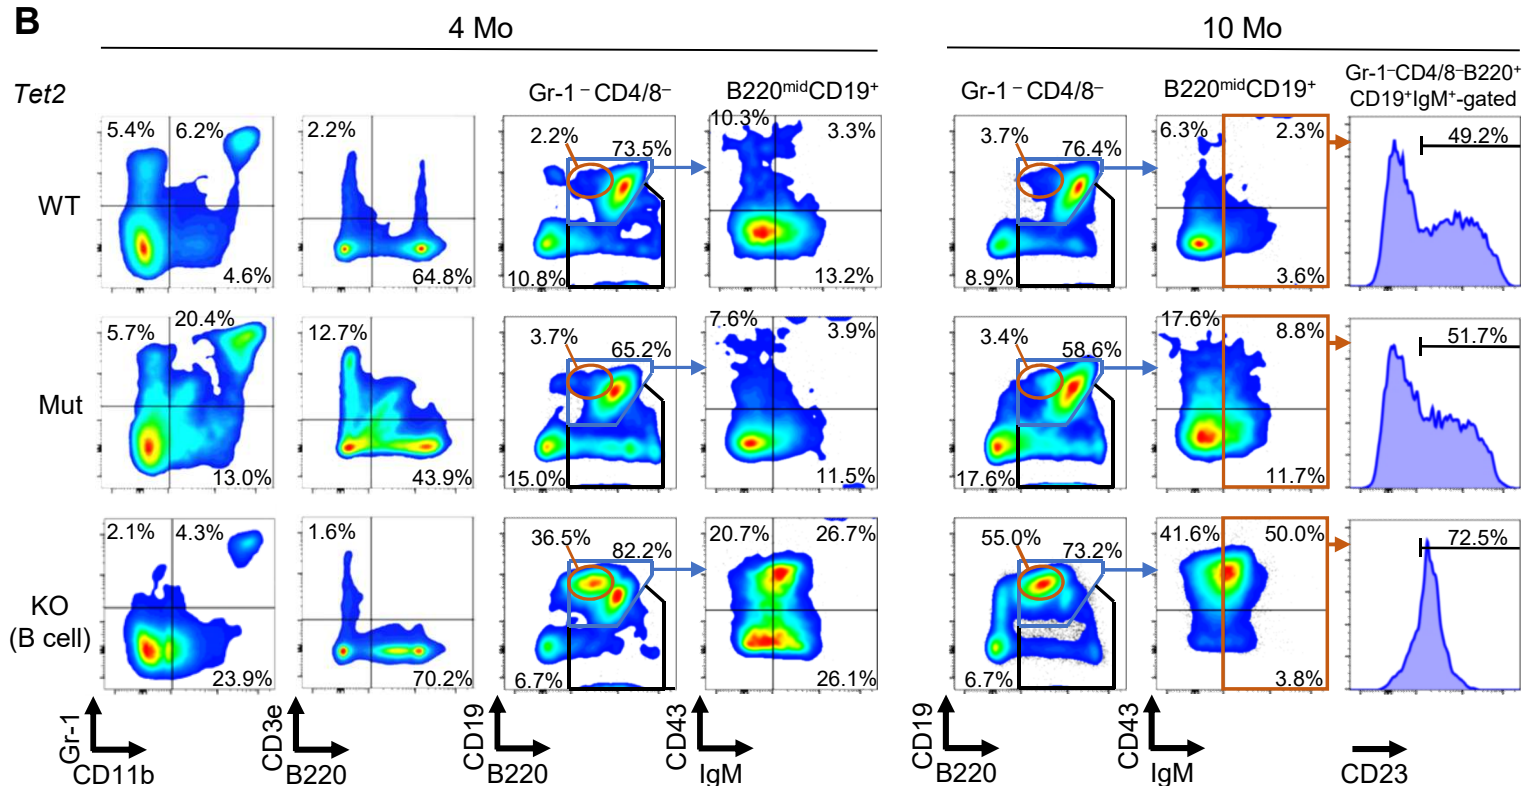**C**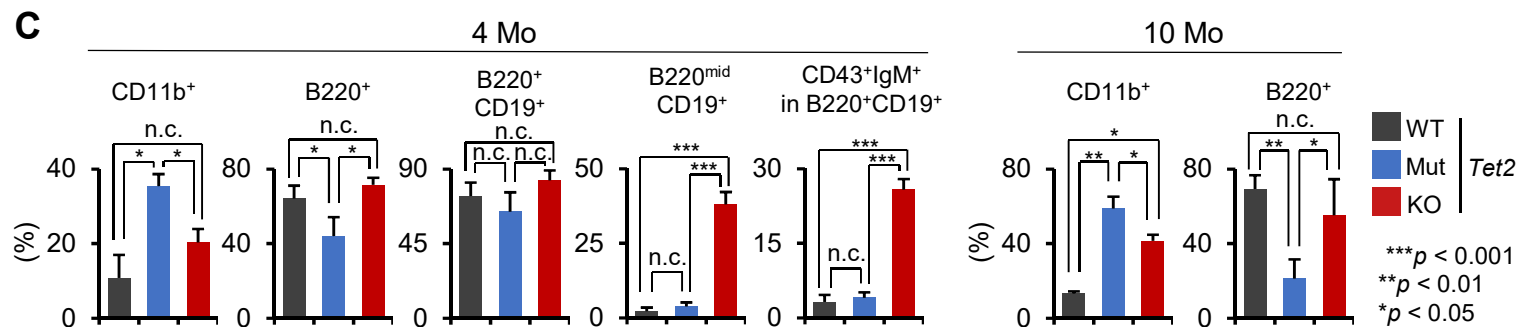

**Figure S3 (Related to Figure 3). Analysis of spleens from *Tet2* Mut and KO mice**

- (A) Representative histologic images of sections of spleen, liver and lymph node from 10-month old *Tet2* Mut mice, stained with H&E. Tissue with myeloid expansion/infiltration are shown (top right for Mut mouse #1, and bottom left for Mut mouse #2). Histologic images of spleen from 10-month old *Tet2* KO mice with B cell phenotypes (bottom right for KO mice #1 and #2, respectively; Magnified spleen image of KO mouse #1, in the inset). Normal tissues in the age-matched wild-type mice are also shown as control (top, left). Scale bars, 250  $\mu$ m.
- (B, C) Representative flow data for myeloid and lymphoid lineages in the spleen from *Tet2* Mut and KO mice (4 months old, B left; 10 months old, B right). Percentages of the indicated fractions are also shown ( $n = 6$ ) (C).

Error bars indicate standard deviation. n.c. stands for no significant change.

Figure S4

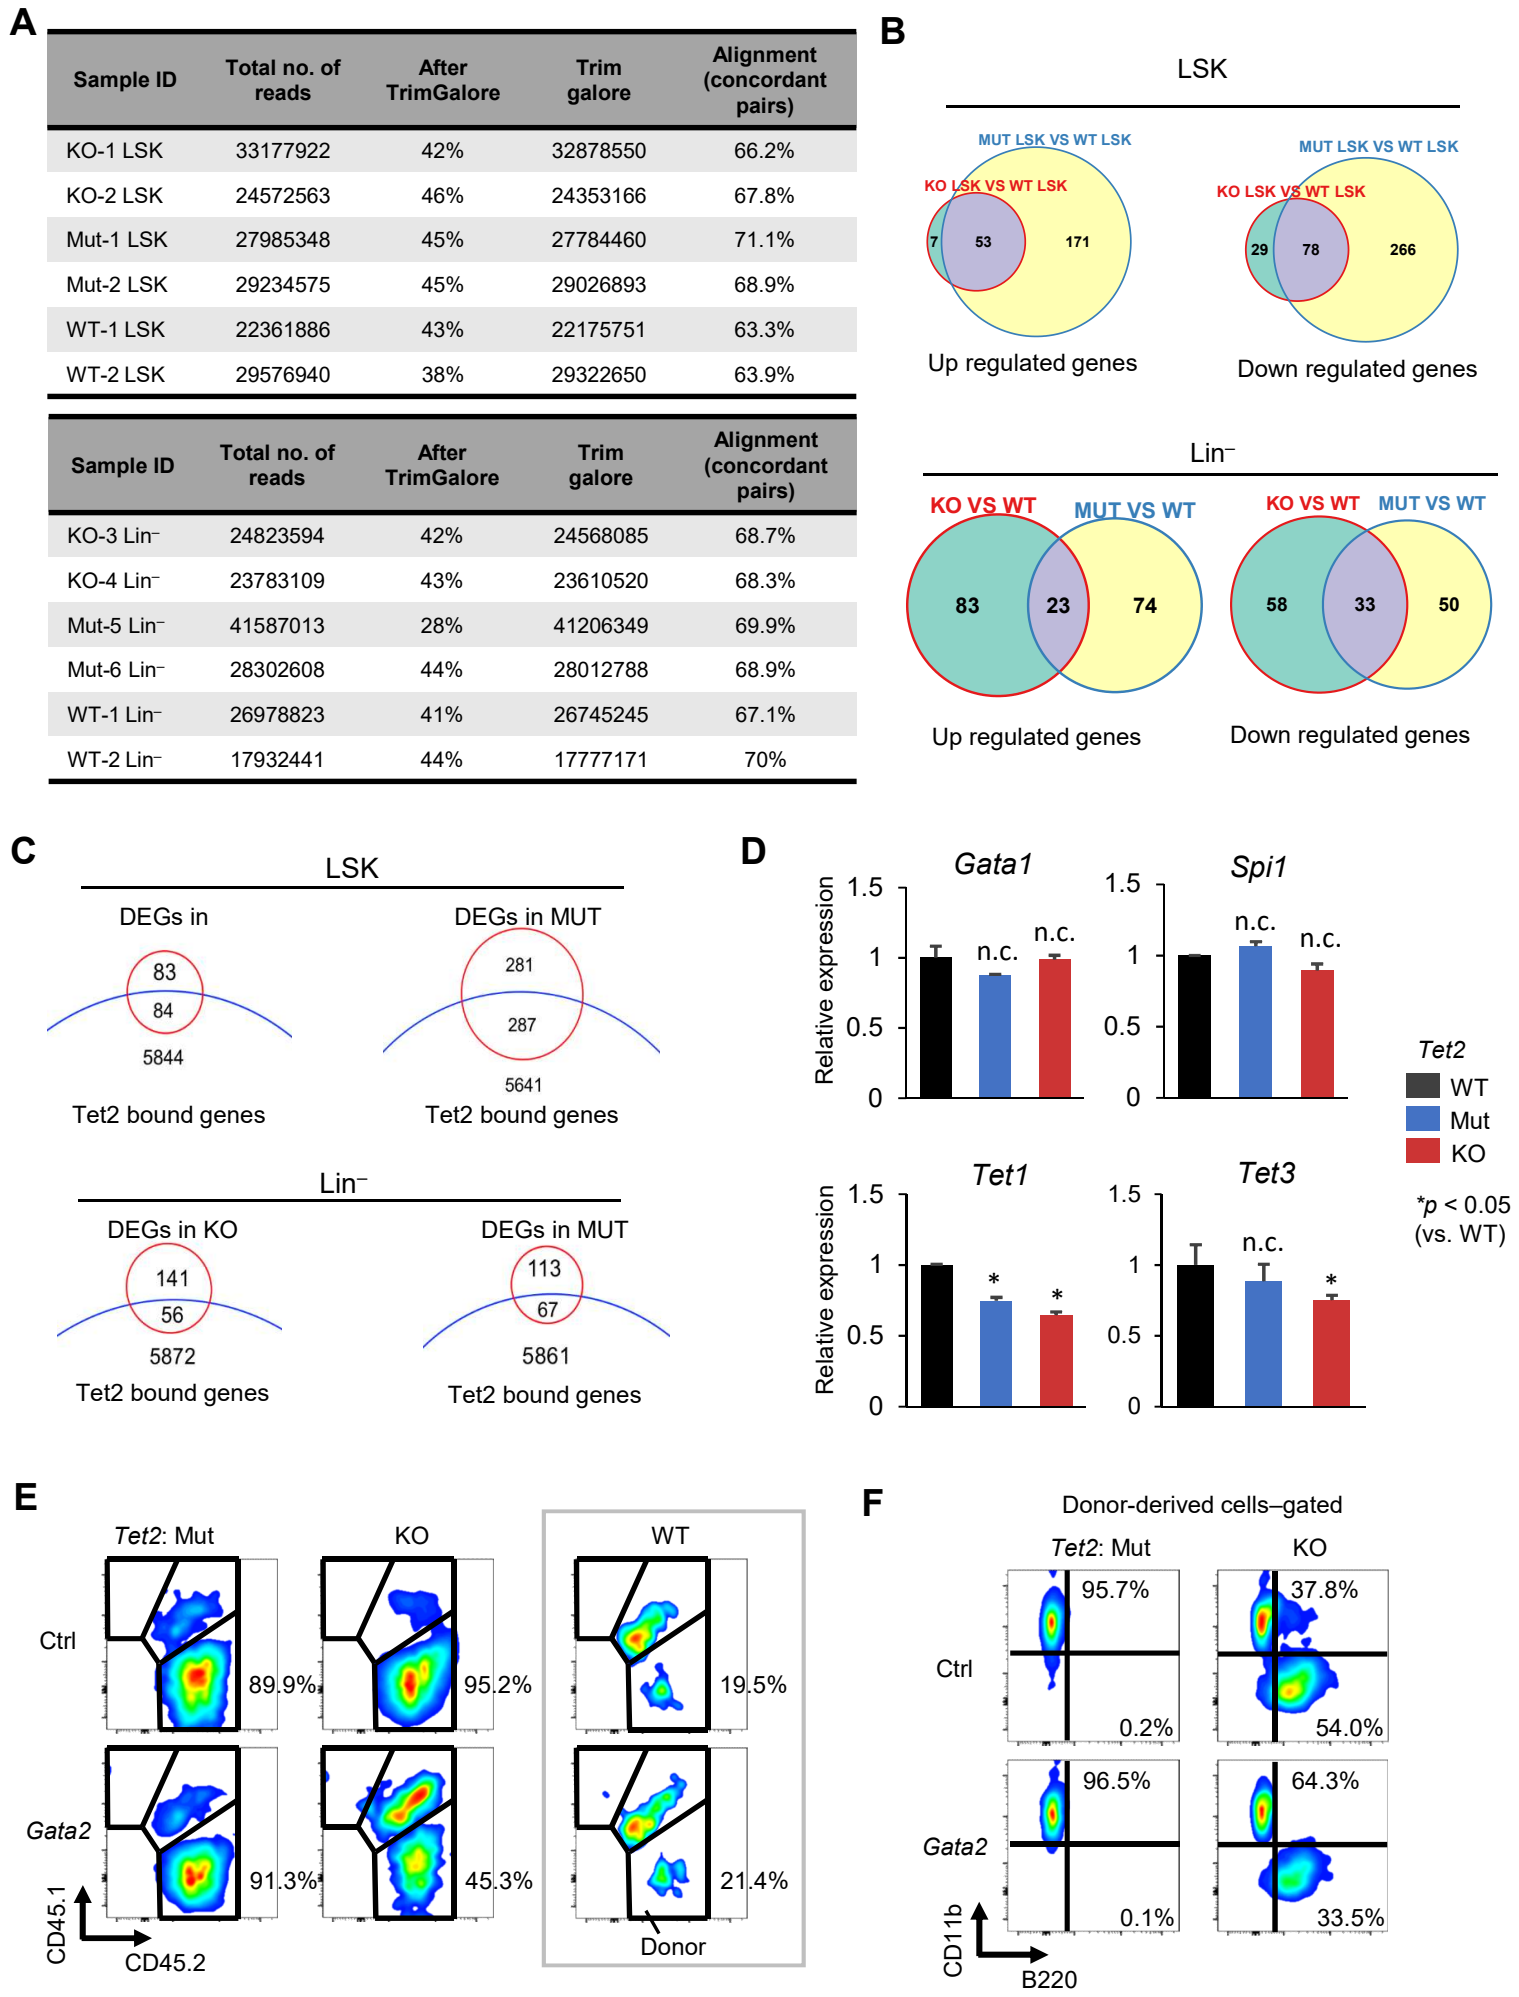

**Figure S4 (Related to Figure 4): Gene expression changes in hematopoietic stem and progenitor cells from *Tet2* Mut and KO mice.**

- (A) Summary of RNA-seq data.
- (B) Venn diagram of up- and down-regulated DEGs in LSK (left) and Lin<sup>-</sup> cells (right).
- (C) Venn diagram showing overlap of DEGs with *Tet2* bound genes in bone marrow.
- (D) mRNA levels of indicated genes in LSK cells isolated from 2-month-old mice, quantified by RT-qPCR. Data normalized to *Gapdh*.
- (E, F) Representative flow cytometric analysis for donor-chimerism (E) and CD11b/B220 positivity (F) in peripheral blood of recipient mice transplanted with *Gata2*-expressing *Tet2* Mut bone marrow cells (bottom left) or *Tet2* KO bone marrow cells (bottom right), 3 weeks after BMT. Empty vector transduced controls are also shown (top).

Error bars indicate standard deviation. n.c. stands for no significant change.

**Table S1 (Related to STAR Methods): List of oligos, gRNAs and gene blocks used in study**

| Name                | Sequence                                                              | Purpose                           | Source                             |
|---------------------|-----------------------------------------------------------------------|-----------------------------------|------------------------------------|
| Tet2 gRNA For oligo | GCATGTTCTGCTGGTCTCTG                                                  | Gene targeting                    | This paper                         |
| Tet2 gRNA Rev oligo | CAGAGACCAGCAGAACATGC                                                  | Gene targeting                    | This paper                         |
| Tet2 gene block     | gcagtgggttacgt...<br>471pb....CCTACAGGGCC...439bp<br>....tcatacacttaa | Gene targeting                    | This paper                         |
| Tet2 Mut Gen Fw     | ATTCTCAGGAGTCACTGCATG                                                 | Genotyping Tet2 mutant mice       | This paper                         |
| Tet2 Mut Gen Rev    | TCTATCCATGAAAACACATGGCC                                               | Genotyping Tet2 mutant mice       | This paper                         |
| Tet2 KO Gen Fw      | CCCATTGTTCTTTGCTCCATGCA                                               | Genotyping Tet2 KO mice KO allele | Zhe et al, Blood 2011              |
| Tet2 KO Gen Rev     | CGTCGCCGTCCAGCTCGACCAG                                                | Genotyping Tet2 KO mice KO allele | Zhe et al, Blood 2011              |
| Tet2 WT Gen Fw      | CCATGCAGGGAAGACAAGAGTAGC                                              | Genotyping Tet2 KO mice WT allele | Zhe et al, Blood 2011              |
| Tet2 WT Gen Rev     | ATCTTGTTTGGATGGAGCCCAGAG                                              | Genotyping Tet2 KO mice WT allele | Zhe et al, Blood 2011              |
| Tet1 RTqPCR Fw      | TGCACCTACTGCAAGAATCG                                                  | Real time qPCR                    | Dawlaty et al, Cell Stem Cell 2011 |
| Tet1 RTqPCR Rev     | AAATTGGCATCACAGCTTCC                                                  | Real time qPCR                    | Dawlaty et al, Cell Stem Cell 2011 |
| Tet2 RTqPCR Fw      | GTCAACAGGACATGATCCAGGAG                                               | Real time qPCR                    | Zhe et al, Blood 2011              |
| Tet2 RTqPCR Rev     | CCTGTTCCATCAGGCTTGCT                                                  | Real time qPCR                    | Zhe et al, Blood 2011              |
| Tet3 RTqPCR Fw      | TCCGGATTGAGAAGGTCATC                                                  | Real time qPCR                    | Dawlaty et al, Develop Cell 2014   |
| Tet3 RTqPCR Rev     | CCAGGCCAGGATCAAGATAA                                                  | Real time qPCR                    | Dawlaty et al, Develop Cell 2014   |
| Hoxa9 RTqPCR Fw     | ATGGCATTAAACCTGAACCG                                                  | Real time qPCR                    | Ailing et al, JCI 2013             |
| Hoxa9 RTqPCR Rev    | GTCTCCGCCGCTCTCATTC                                                   | Real time qPCR                    | Ailing et al, JCI 2013             |
| Gata1 RTqPCR Fw     | TGCCTGTGGCTTGATCA                                                     | Real time qPCR                    | Kaimakis et al, Blood 2016         |
| Gata1 RTqPCR Rev    | TGTTGTAG GGTCGTTTGAC                                                  | Real time qPCR                    | Kaimakis et al, Blood 2016         |
| Gata2 RTqPCR Fw     | AAGCTGCACAATGTTAACAGG                                                 | Real time qPCR                    | Kaimakis et al, Blood 2016         |
| Gata2 RTqPCR Rev    | CCTTTCTTGCTCTTCTTGAC                                                  | Real time qPCR                    | Kaimakis et al, Blood 2016         |
| Gapdh RTqPCR Fw     | ACATCTCACTCAAGATTGTCAGCA                                              | Real time qPCR                    | Dawlaty et al, Develop Cell 2014   |
| Gapdh RTqPCR Rev    | ATGGCATGGACTGTGGTCAT                                                  | Real time qPCR                    | Dawlaty et al, Develop Cell 2014   |
